# Supplementary material for: Induction of Redox-Active Gene Expression by CoCl2 Ameliorates Oxidative Stress-Mediated Injury of Murine Auditory Cells
Source: Antioxidants (Basel). 2019 Sep 16;8(9):399. doi: 10.3390/antiox8090399 (PMC6769615; doi:10.3390/antiox8090399)
Supplement: Supplementary file 1 [file antioxidants-08-00399-s001.pdf]

Supplementary Materials.

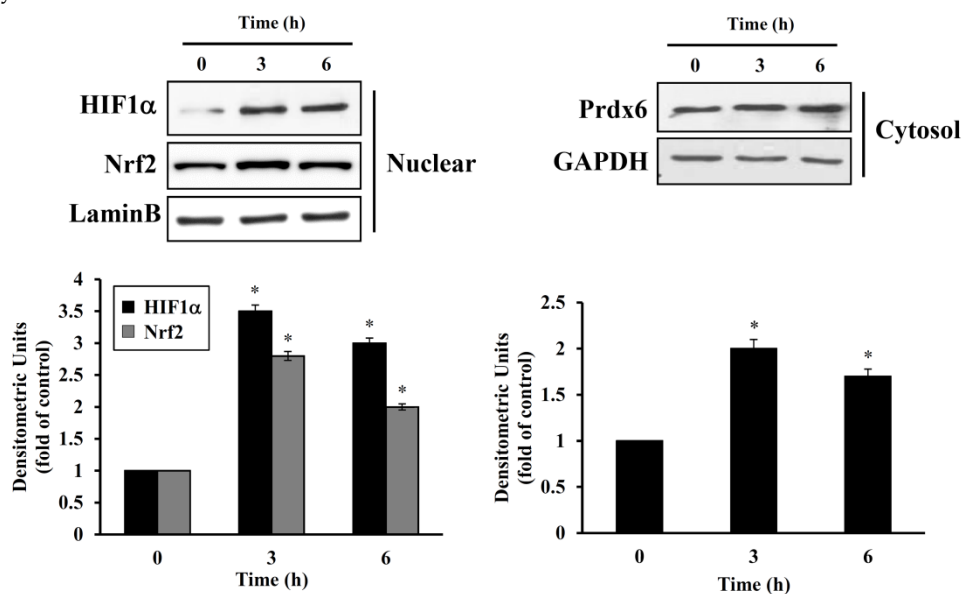

**Figure 1.** Expression of HIF-1 $\alpha$ , Nrf2, and Prdx6 at 0–6 h of 100  $\mu$ M H<sub>2</sub>O<sub>2</sub> treatment. Cells were treated with 100  $\mu$ M H<sub>2</sub>O<sub>2</sub> for the indicated times and nuclear and cytosolic proteins were analyzed by immunoblotting for HIF-1 $\alpha$ , Nrf-2, and Prdx6. Protein bands were quantified using densitometry, and their abundances were expressed relative to the density of Lamin B or GAPDH band. The ratio of HIF-1 $\alpha$  and Nrf-2 to Lamin B or Prdx6 to GAPDH are presented as fold changes relative to the untreated control. Data are presented as the means  $\pm$  SDs of three independent experiments (\* $p$  < 0.05, compared with the control; # $p$  < 0.05, CoCl<sub>2</sub> versus H<sub>2</sub>O<sub>2</sub>).
